# Supplementary material for: Comprehensive analysis of tumor microenvironment and identification of an immune signature to predict the prognosis and immunotherapeutic response in lung squamous cell carcinoma
Source: PubMed Central journal article supplement — Ann Transl Med. 2021 Apr;9(7):569. doi: 10.21037/atm-21-463 (PMC8105790; doi:10.21037/atm-21-463), 2021-04
Supplement: atm-09-07-569-supplementary.pdf [file atm-09-07-569-supplementary.pdf]

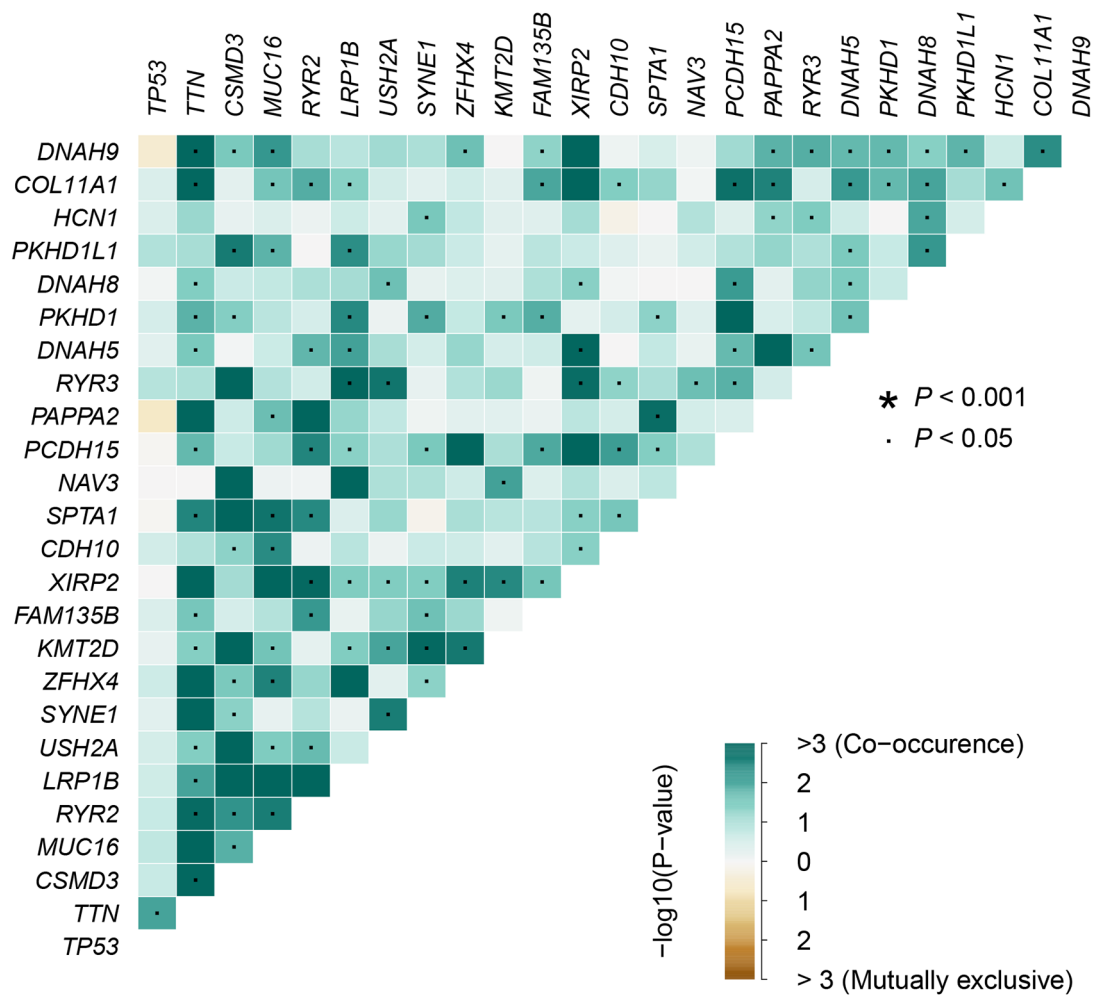

Figure S1 Co-occurrence association between mutated genes.

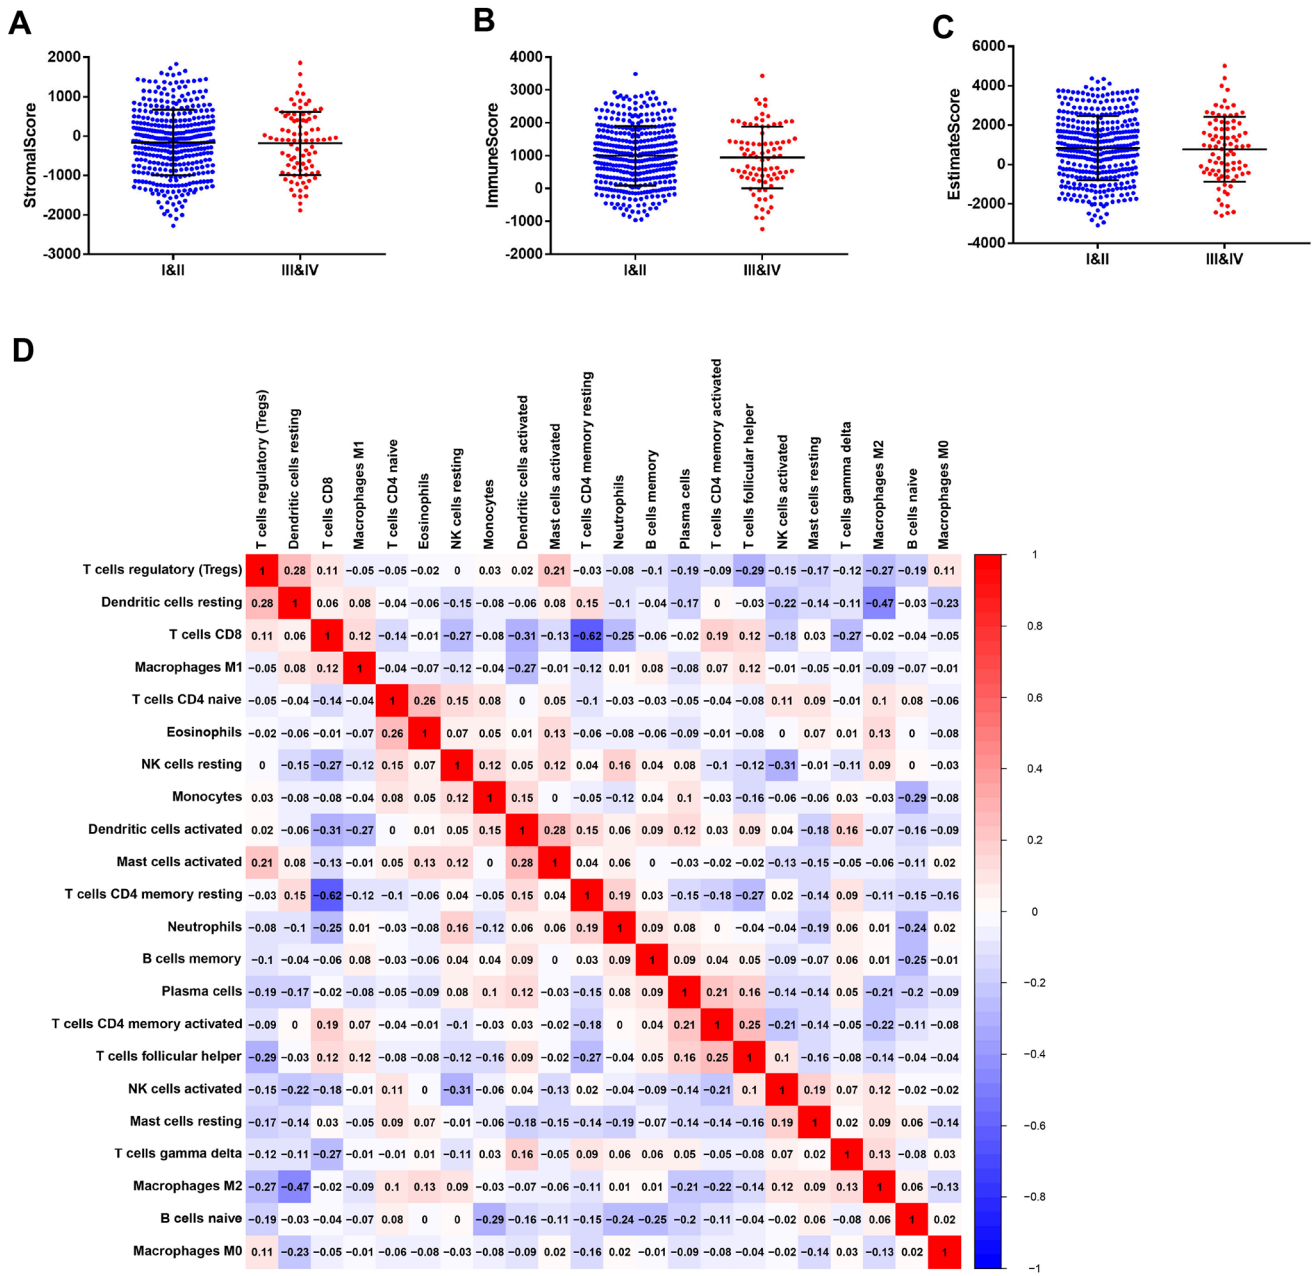

**Figure S2** Tumor microenvironment characterization analysis in LUSC. (A-C) Stromal, immune, and ESTIMATE scores t different pathological stages. (D) Correlations of immune cells. NK, natural killer.
